# Supplementary material for: Atrial Anti-Arrhythmic Effects of Heptanol in Langendorff-Perfused Mouse Hearts
Source: PLoS One. 2016 Feb 12;11(2):e0148858. doi: 10.1371/journal.pone.0148858 (PMC4752503; doi:10.1371/journal.pone.0148858)
Supplement: S1 Dataset — (XLSX) [file pone.0148858.s001.xlsx]

## Sheet: Atrial data
latency
Arrhythmic hearts			Non-arrhythmic hearts
Control	2 mM	Washout	Control	2 mM	Washout
0.02288	0.02741	0.02179	0.02083	0.03522	0.02059
0.01846	0.0234	0.01608	0.02584	0.02871	0.03047
0.01862	0.02963	0.02046	0.03361	0.02892	0.01915
0.0165	0.03059	0.0183	0.02521	0.03034	0.02154
0.02224	0.0276	0.02097	0.01421	0.04208	0.02133
0.01883	0.04194	0.02106	0.02932	0.03233	0.02123
0.01891	0.02998	0.02194	0.02137	0.03502	0.01817
0.02025	0.03081	0.02567	0.01917	0.01783	0.01798
0.01148	0.01848	0.02457
CV
Arrhythmic hearts			Non-arrhythmic hearts
Control	2 mM	Washout	Control	2 mM	Washout
0.1311	0.10945	0.13768	0.14399	0.08518	0.1457
0.16254	0.12822	0.18657	0.11612	0.1045	0.09846
0.16111	0.10125	0.14663	0.08926	0.10373	0.15666
0.18176	0.09807	0.16393	0.11902	0.0989	0.13928
0.13488	0.1087	0.14306	0.21106	0.07128	0.14065
0.15929	0.07153	0.14245	0.10233	0.09279	0.14131
0.15869	0.10008	0.13671	0.14038	0.08567	0.16511
0.14814	0.09737	0.11687	0.15647	0.16823	0.16685
0.26132	0.16234	0.1221
AERP
Arrhythmic hearts			Non-arrhythmic hearts
Control	2 mM	Washout	Control	2 mM	Washout
0.03394	0.05823	0.03779	0.05037	0.05324	0.04407
0.02408	0.06618	0.02719	0.03614	0.04107	0.03422
0.0194	0.04453	0.02788	0.066	0.06596	0.05635
0.02987	0.06557	0.03604	0.04263	0.05696	0.04981
0.02004	0.05785	0.02422	0.04848	0.05705	0.04419
0.02567	0.06507	0.02312	0.04505	0.05243	0.04591
0.03515	0.05136	0.03994	0.068	0.073	0.05505
0.02453	0.05316	0.03209	0.02204	0.05604	0.02397
0.02098	0.05209	0.02371
APD
Arrhythmic hearts			Non-arrhythmic hearts
Control	2 mM	Washout	Control	2 mM	Washout
0.0288716	0.0283463	0.02801	0.02424	0.0230477	0.02678
0.0248338	0.0311665	0.02792	0.027726	0.017603	0.02541
0.0265888	0.0241657	0.02677	0.0204888	0.0309145	0.02196
0.0262338	0.0254194	0.02604	0.0231454	0.028167	0.0232
0.0215288	0.0268509	0.0229	0.0251352	0.0254181	0.02363
AERP/latency ratio
Arrhythmic hearts			Non-arrhythmic hearts
Control	2 mM	Washout	Control	2 mM	Washout
1.48339	2.12441	1.73428	2.41815	1.51164	2.14036
1.30444	2.82821	1.69092	1.39861	1.43051	1.12307
1.04189	1.50287	1.36266	1.9637	2.28077	2.94256
1.8103	2.14351	1.9694	1.691	1.87739	2.31244
0.901079	2.09601	1.15498	3.41168	1.35575	2.07173
1.36325	1.5515	1.09782	1.53649	1.62171	2.16251
1.8588	1.71314	1.82042	3.18203	2.08452	3.02972
1.21136	1.72541	1.2501	1.14971	3.14302	1.33315
1.82753	2.81872	0.964998
AERP/APD ratio
1.30003	2.13496	1.51339	1.51213	1.66642	1.37681
0.92236	2.42644	1.08888	2.76151	2.67634	2.2672
0.7431	1.63266	1.11652	1.78368	2.31116	2.00406
1.14414	2.40408	1.4433	2.02845	2.31481	1.77795
0.76761	2.12103	0.96994	1.88494	2.12735	1.84715
0.98326	2.38575	0.92589	2.84519	2.96198	2.21489
1.34638	1.88308	1.59949	0.92218	2.27383	0.96441
0.93959	1.94907	1.28512
0.80362	1.90984	0.94952
